# Supplementary material
Source: PubMed Central journal article supplement (PMC2659280)
Supplement: en.2008-0863_1.pdf [file en.2008-0863_1.pdf]

**Figure S1. Nascent RNA analysis of GR regulated genes and time dependent occupancy of GR binding in the Hepa1c1c7 cell line.** GR responsive genes in the hepatocyte cell line, Hepa1c1c7, also show a time-dependent variation in the response to hormone and exhibit a similar diversity of kinetic profiles as observed in the mammary adenocarcinoma cell line (3134) and the pituitary corticotroph (AtT-20). Nascent transcript levels were determined after hormone addition for members of the rapid induction class [Sgk, Glul (Fig. S1, panels A-B)], the transiently induced class [Tgm2 (Fig. S1, panel (C))] and the continuously induced class [Sbp1 (Fig. S1, panel D)]. Transcript levels were also determined for the rapidly repressed class [Ccl2 (Fig. S1, panel E)] and the continuously repressed class [Plk2 (Fig. S1, panel F)]. Error bars show the standard deviation from the mean. q-PCR experiments represent three independent experiments (biological replicates) performed in duplicate (technical replicates).

The interaction of GR binding at hepatocyte responsive genes follows a similar complex and variable pattern during hormone treatment as observed in the 3134 and AtT-20 cell lines. GR binding can track closely with nascent transcript levels (Fig. S1, panels B, C, F) however, GR occupancy can sometimes be uncoupled from transcript levels (Fig. S1, panels A, E).

Primer sequences for q-PCR characterization of nascent RNA in Hepa1c1c7 are as follows:

Sbp1            Forward CTGCCTGGTCTCATCTCCTC  
Sbp 1           Reverse CTCTAGTAAGACATGAGGTAA

Primer sequences for GR ChIP in Hepa1c1c7 are as follows:

Sbp1            Forward ATGAGCCTGTTCAACCTCCC  
Sbp1            Reverse GCTGTGTGTCCTTAGGCTTC  
Tgm2            Forward GCTCCGTGTTGCCTGTTTGC  
Tgm2            Reverse TGGTTCAGGGCACAGTCTGG

Edn1 Forward CACTCTCCATGCTGGCTGGGAT

Edn1 Reverse CGCAGACAGGCTAGGGAACA

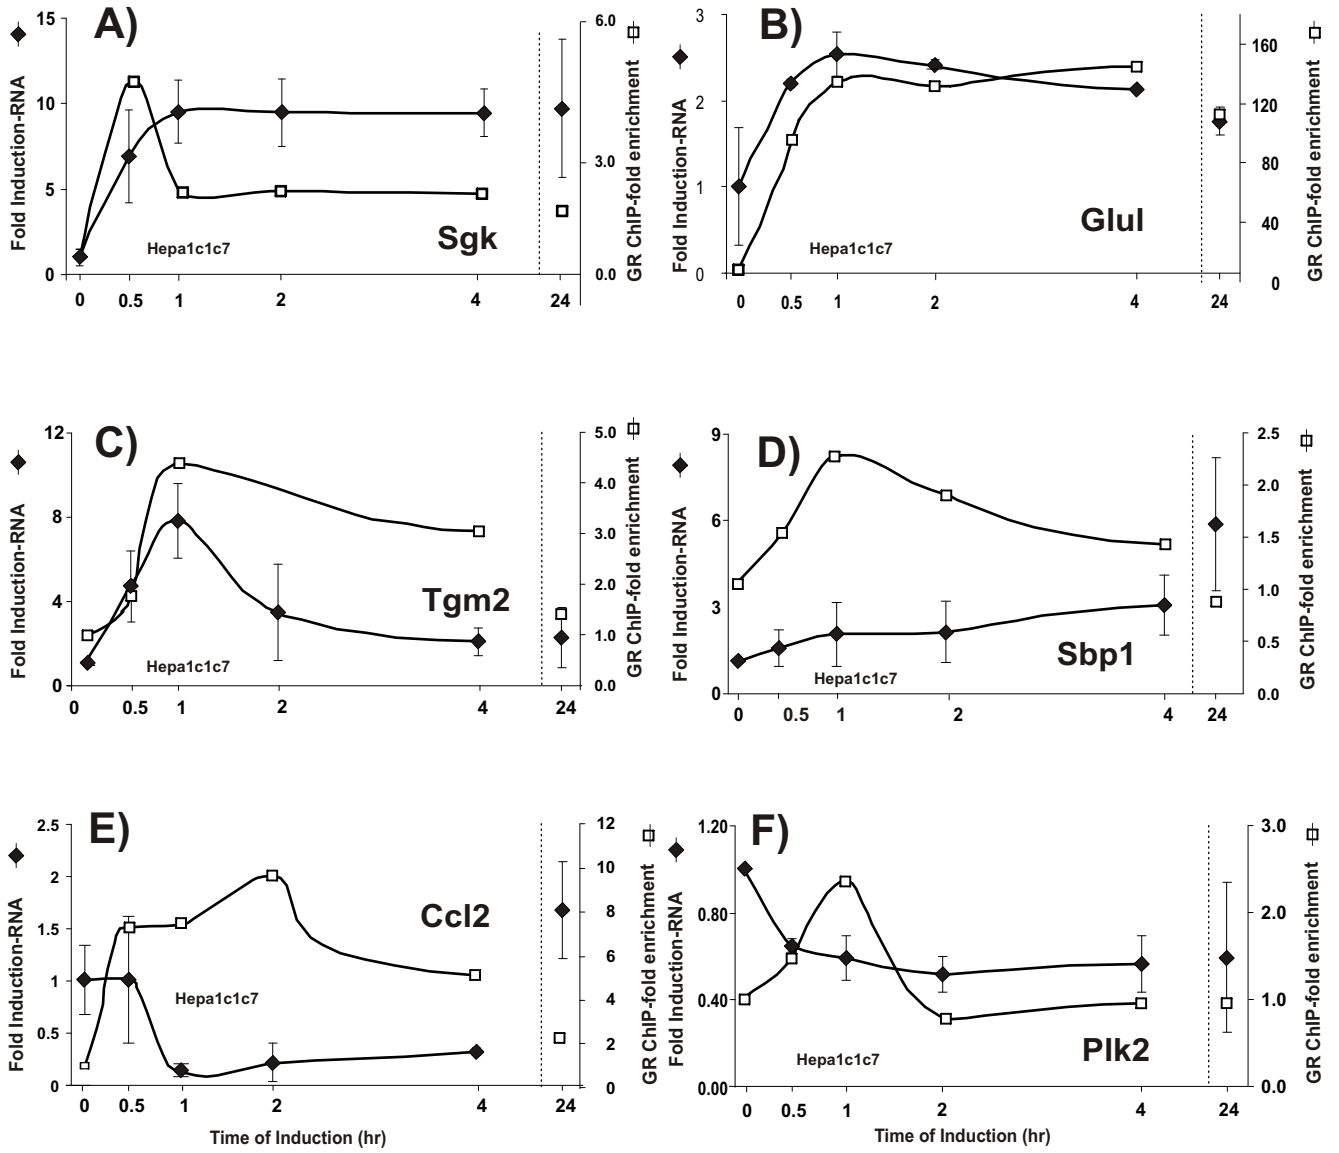

Fig S1
