# Supplementary material
Source: PubMed Central journal article supplement (PMC2659280)
Supplement: en.2008-0863_2.pdf [file en.2008-0863_2.pdf]

**Supplementary Figure S2. Kinetic complexity of the global GR response.** A) Schematic summary of time-dependent transcriptional classes for the GR responsive genes. These categories are based on putative transcription rates, derived from nascent RNA levels (Fig's. 2, 3, 5 and S1) rather than the accumulation of mature mRNA. Six classes of response are described (see Discussion)

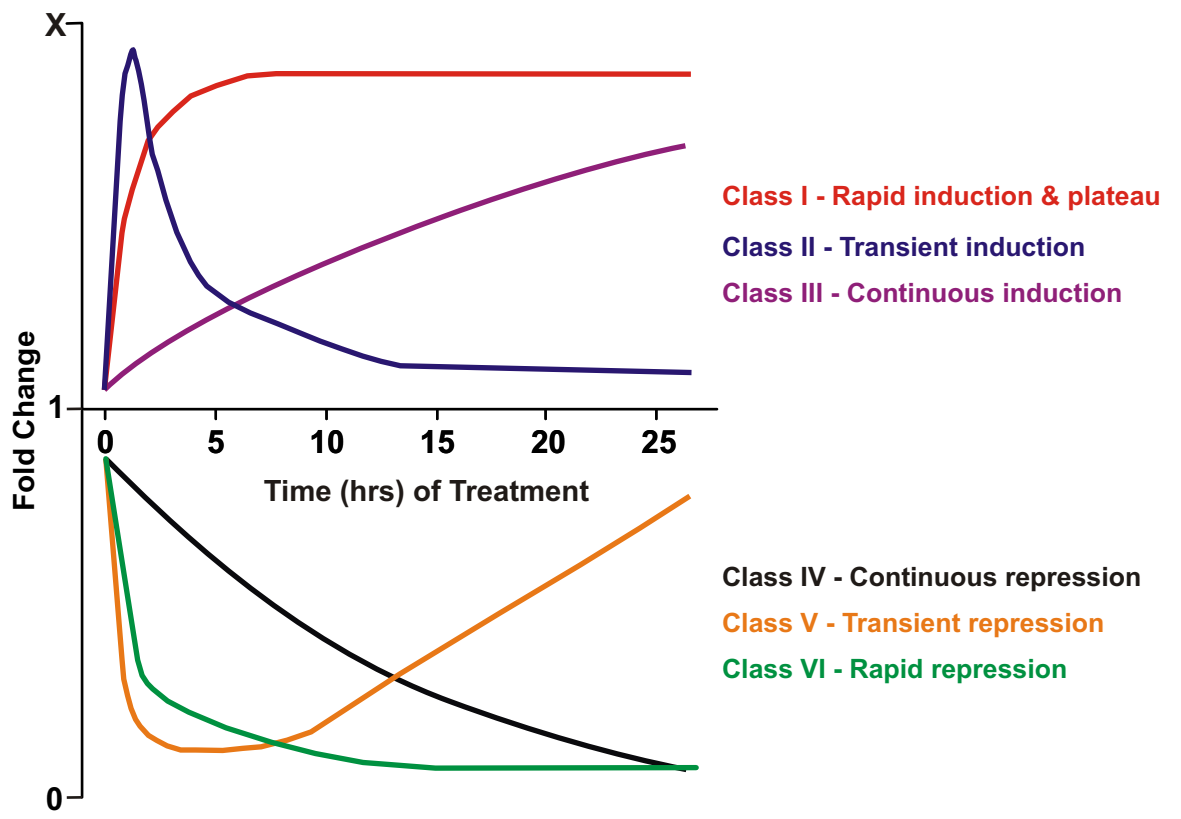

Fig S2
